# Supplementary material for: A carrier-free dual-drug nanodelivery system functionalized with aptamer specific targeting HER2-overexpressing cancer cells
Source: Royal Society of Chemistry journal article supplement (doi:10.1039/c7tb02562a), 2017-01-01
Supplement: c7tb02562a1.pdf [file c7tb02562a1.pdf]

## ***Electronic Supplementary Information***

### ***A Carrier-free Dual-drug Nanodelivery System Functionalized with Aptamer Specific Targeting HER2-overpressing Cancer***

#### **Authors:**

Kai Jiang <sup>‡, a</sup>, Longyu Han <sup>‡, a</sup>, Yan Guo <sup>a</sup>, Guirong Zheng <sup>a</sup>, Bingchen Zhang <sup>a</sup>, Lulu Fan <sup>a</sup>, Zhichun Shen <sup>a</sup>, Ruirui Zhao <sup>a</sup>, Jingwei Shao <sup>a, \*</sup>

a. Cancer Metastasis Alert and Prevention Center, Pharmaceutical Photocatalysis of State Key Laboratory of Photocatalysis on Energy and Environment, and Fujian Provincial Key Laboratory of Cancer Metastasis Chemoprevention and Chemotherapy, College of Chemistry, Fuzhou University, Fuzhou 350116, China.

<sup>‡</sup>. These authors contributed equally.

**\* Corresponding author:** Jingwei Shao

**Address:** 2 Xueyuan Road, Sunshine Technology Building, 6FL, Fuzhou University, Fuzhou, Fujian 350116, China

**E-mail:** shaojingwei@fzu.edu.cn (J.W. Shao); shaojw12@163.com (J.W. Shao)

**Telephone:** + 86-13600802402

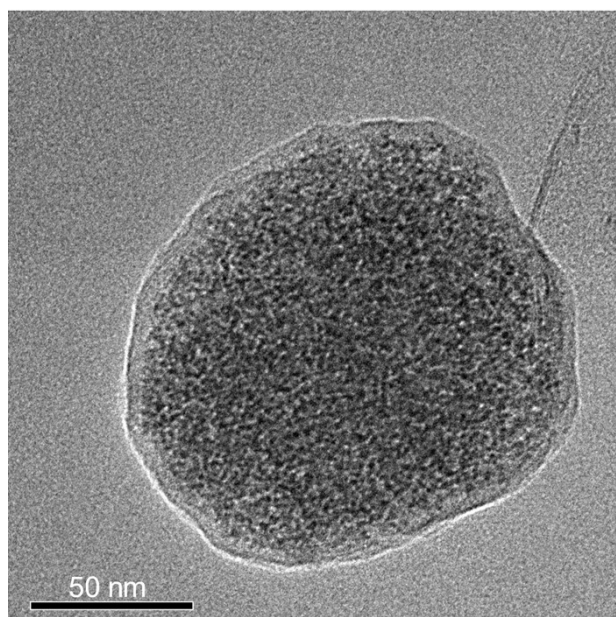

**Fig. S1 The TEM image of Ap/UD NPs.**

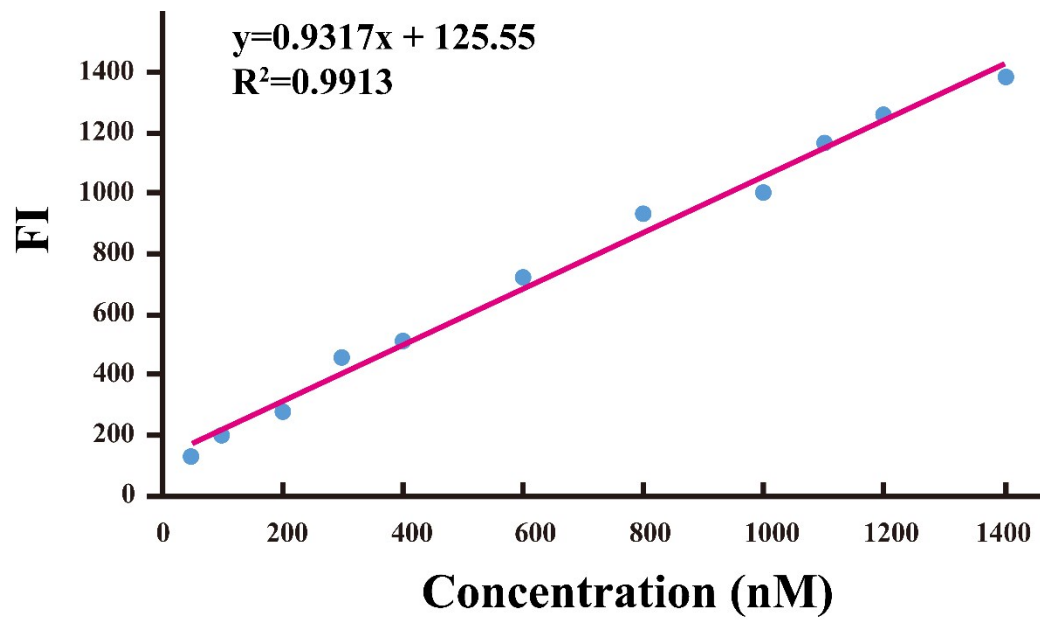

**Fig. S2** The absorbance of Cy5 at 663 nm as a function.

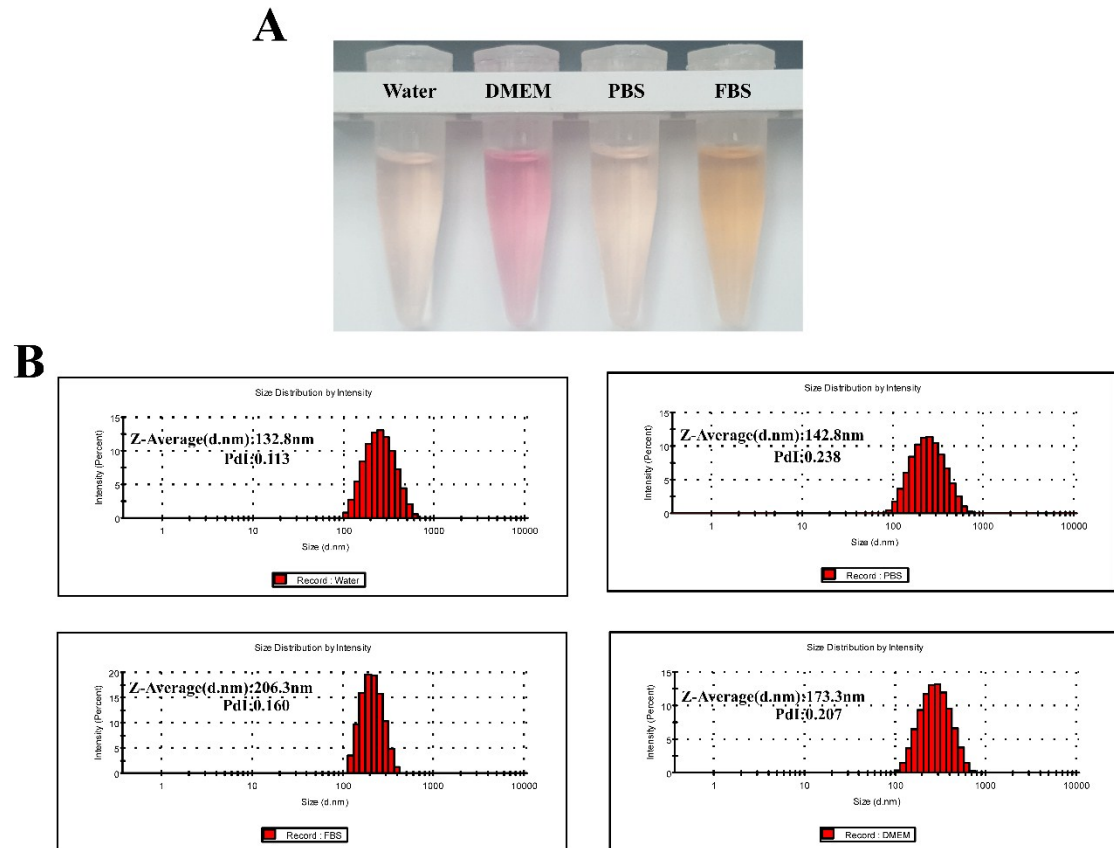

**Fig. S3 The result of stability assay. (A)** The image of Ap/UD NPs in different physiological mediums (water, DMEM, PBS, fetal bovine serum ( FBS)) after 72 h. **(B)** The size and PDI of Ap/UD NPs in different physiological mediums after 72 h.

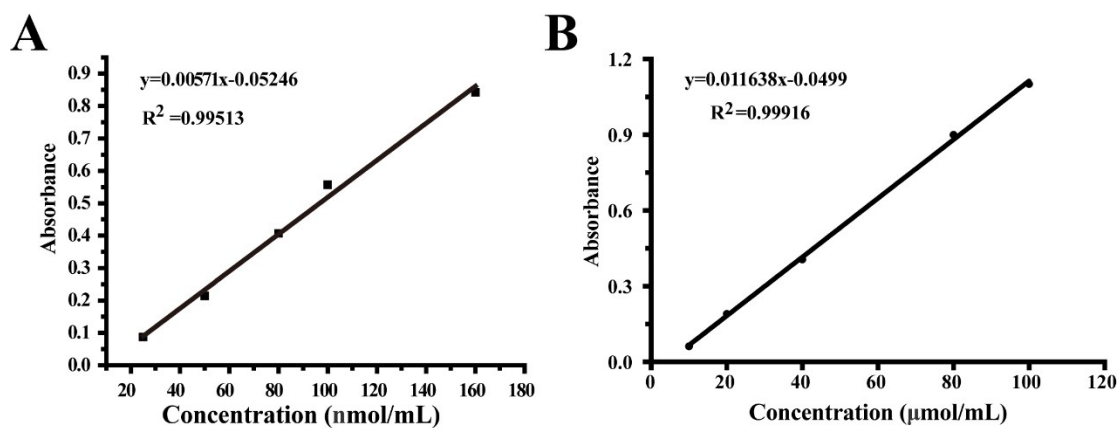

**Fig. S4** The absorbance of DOX molecules at 466 nm and UA molecules at 210 nm as a function.
